# Supplementary material
Source: publisher site journal article supplement (https://www.dovepress.com/article/501105)
Supplement: Supplementary file 1 [file get_supplementary_file.php]

**Supplementary Material**

**Exploring Inflammatory Changes in the Peripheral Blood of Type 2 Diabetes Mellitus in China**

Dan Li, Zhiru Zhang, Wen Li, Chenhao Zhao, Xiaochen Li, Zhen Pan, Yang Li

**Supplementary Figures**


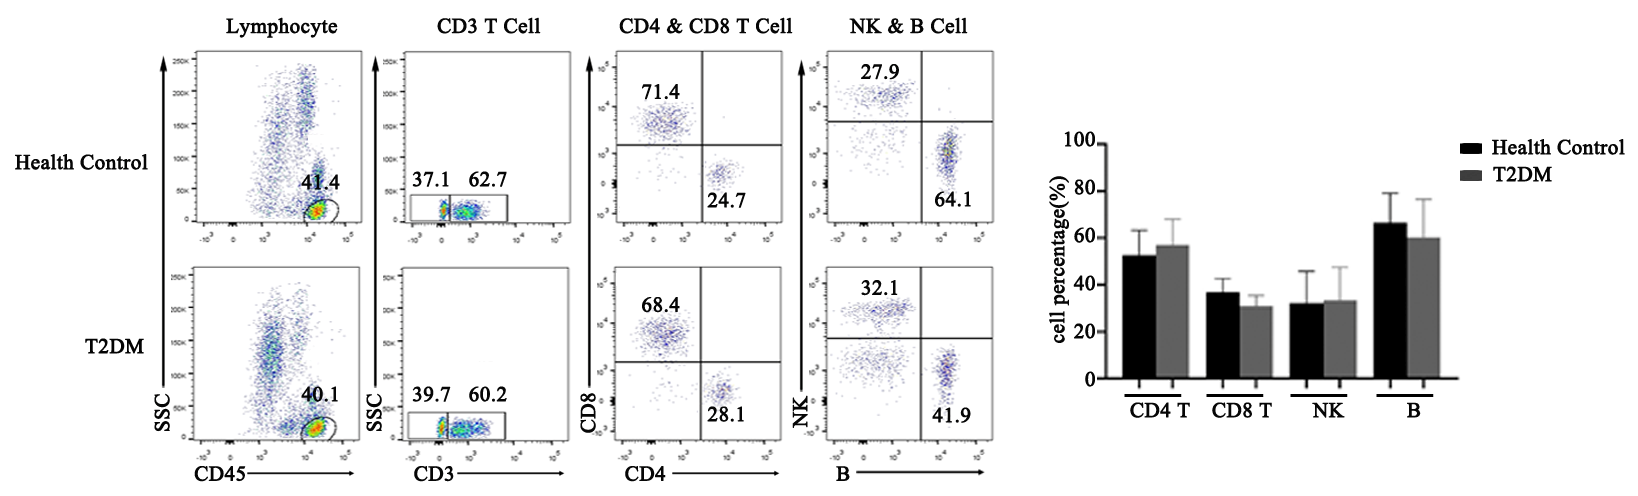


**Supplementary Fig.1** Flow cytometry and histogram analysis showed different lymphocyte subsets in the peripheral blood of patients with T2DM and healthy individuals.


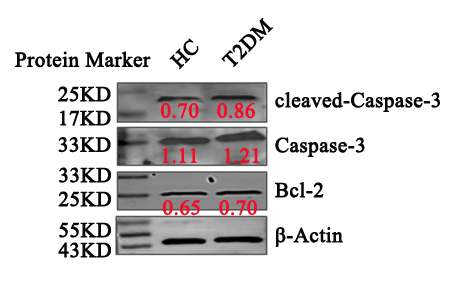


**Supplementary Fig.2** Detection of apoptosis related proteins from peripheral monocytes of patients with T2DM and health individuals by western blotting and gray analysis.
